# Supplementary material for: Guide to the Assessment of Mature Liver Gene Expression in Stem Cell-Derived Hepatocytes
Source: PubMed Central journal article supplement (PMC6648222; doi:10.1089/scd.2019.0064), 2019-07-16
Supplement: Supp_TableS1.pdf [file Supp_TableS1.pdf]

## Supplementary Data

SUPPLEMENTARY TABLE S1. INFORMATION  
ON THE DONOR TISSUES

| <i>Tissue</i> | <i>Sample ID</i> | <i>Age</i> | <i>Gender</i> |
|---------------|------------------|------------|---------------|
| Fetal         | 1                | 16 weeks   | UN            |
| Fetal         | 2                | 17 weeks   | UN            |
| Fetal         | 3                | 22 weeks   | UN            |
| Fetal         | 4                | 17 weeks   | UN            |
| Fetal         | 5                | 91 days    | M             |
| Fetal         | 6                | 22 weeks   | M             |
| Fetal         | 7                | 20 weeks   | UN            |
| Fetal         | 8                | 21 weeks   | UN            |
| Fetal         | 9                | 19 weeks   | F             |
| Fetal         | 10               | 16 weeks   | UN            |
| Fetal         | 11               | 24 weeks   | UN            |
| Fetal         | 12               | 89 days    | M             |
| Fetal         | 13               | 88 days    | M             |
| Fetal         | 14               | 89 days    | F             |
| Fetal         | 15               | 91 days    | F             |
| Fetal         | 16               | 89 days    | M             |
| Fetal         | 17               | 74 days    | M             |
| Mature        | 18               | 12 years   | F             |
| Mature        | 19               | 62 years   | M             |
| Mature        | 20               | 44 years   | M             |
| Mature        | 21               | 18 years   | F             |
| Mature        | 22               | 15 years   | F             |
| Mature        | 23               | 28 years   | F             |
| Mature        | 24               | 70 years   | M             |
| Mature        | 25               | 64 years   | M             |
| Mature        | 26               | 43 years   | F             |
| Mature        | 27               | 23 years   | F             |
| Mature        | 28               | 25 years   | F             |
| Mature        | 29               | 67 years   | F             |
| Mature        | 30               | 70 years   | M             |
| Mature        | 31               | 57 years   | M             |
| Mature        | 32               | 44 years   | M             |
| Mature        | 33               | 22 years   | M             |
| Mature        | 34               | 79 years   | M             |
| Mature        | 35               | 57 years   | M             |
| Mature        | 36               | 49 years   | F             |
| Mature        | 37               | 16 years   | M             |
| Mature        | 38               | 12 years   | F             |
| Mature        | 39               | 30 years   | F             |
| Mature        | 40               | 5,5 years  | M             |
| Mature        | 41               | 24 years   | M             |
| Mature        | 42               | 53 years   | M             |
