# Supplementary material for: Guide to the Assessment of Mature Liver Gene Expression in Stem Cell-Derived Hepatocytes
Source: PubMed Central journal article supplement (PMC6648222; doi:10.1089/scd.2019.0064), 2019-07-16
Supplement: Supp_TableS2.pdf [file Supp_TableS2.pdf]

SUPPLEMENTARY TABLE S2. TAQMAN ASSAYS USED FOR GENE EXPRESSION ANALYSIS

|                                                | <i>Gene symbol</i>                      | <i>Gene name</i>                                         | <i>Assay ID</i> |
|------------------------------------------------|-----------------------------------------|----------------------------------------------------------|-----------------|
| Liver-specific plasma proteins/metabolic genes | PPIA                                    | Cyclophilin A (peptidylprolyl isomerase A)               | Hs99999904_m1   |
|                                                | ALB                                     | Human albumin                                            | Hs00609411_m1   |
|                                                | AFP                                     | Alpha-fetoprotein                                        | Hs00173490_m1   |
|                                                | A1AT                                    | Alpha-1 antitrypsin (SERPINA1)                           | Hs01097800_m1   |
|                                                | GLUL                                    | Glutamate-ammonia ligase (glutamine synthetase)          | Hs01018343_g1   |
|                                                | OTC                                     | Ornithine carbamoyltransferase                           | Hs00166892_m1   |
|                                                | CPS1                                    | Carbamoyl-phosphate synthetase 1                         | Hs00157048_m1   |
|                                                | PAH                                     | Phenylalanine hydroxylase                                | Hs00609359_m1   |
| Phase I genes                                  | FAH                                     | Fumarylacetoacetate hydrolase                            | Hs00908445_m1   |
|                                                | CYP1A1                                  | Cytochrome P450 family 1 subfamily A member 1            | Hs00153120_m1   |
|                                                | CYP1A2                                  | Cytochrome P450 family 1 subfamily A member 2            | Hs01070374_m1   |
|                                                | CYP2B6                                  | Cytochrome P450 family 2 subfamily B member 6            | Hs03044634_m1   |
|                                                | CYP2C8                                  | Cytochrome P450 family 2 subfamily C member 8            | Hs00258314_m1   |
|                                                | CYP2C9                                  | Cytochrome P450 family 2 subfamily C member 9            | Hs00426397_m1   |
|                                                | CYP2C19                                 | Cytochrome P450 family 2 subfamily C member 19           | Hs00426380_m1   |
|                                                | CYP2D6                                  | Cytochrome P450 family 2 subfamily D member 6            | Hs02576167_m1   |
|                                                | CYP3A4                                  | Cytochrome P450 family 3 subfamily A member 4            | Hs00430021_m1   |
|                                                | CYP3A7                                  | Cytochrome P450 family 3 subfamily A member 7            | Hs00426361_m1   |
|                                                | CYP7A1                                  | Cytochrome P450 family 7 subfamily A member 1            | Hs00167982_m1   |
| Phase II genes                                 | CYP7B1                                  | Cytochrome P450 family 7 subfamily B member 1            | Hs00191385_m1   |
|                                                | UGT1A1                                  | UDP glucuronosyltransferase 1 family member A1           | Hs02511055_s1   |
|                                                | UGT1A6                                  | UDP glucuronosyltransferase 1 family member A6           | Hs01592477_m1   |
|                                                | UGT1A9                                  | UDP glucuronosyltransferase 1 family member A9           | Hs02516855_sH   |
|                                                | UGT2B7                                  | UDP glucuronosyltransferase 2 family member B7           | Hs00426592_m1   |
|                                                | UGT2B10                                 | UDP glucuronosyltransferase 2 family member B10          | Hs02556282_s1   |
| Transcriptions factors                         | UGT2B17                                 | UDP glucuronosyltransferase 2 family member B17          | Hs00854486_sH   |
|                                                | LXR $\alpha$                            | Liver X receptor alpha (NR1H3)                           | Hs00172885_m1   |
|                                                | LXR $\beta$                             | Liver X receptor beta (NR1H2)                            | Hs01027215_g1   |
|                                                | FXR                                     | Farnesoid X nuclear receptor (NR1H4)                     | Hs00231968_m1   |
|                                                | PXR                                     | Pregnane X nuclear receptor (NR1I2)                      | Hs01114267_m1   |
|                                                | CAR                                     | Constitutive androstane nuclear receptor (NR1I3)         | Hs00231959_m1   |
|                                                | PPAR $\alpha$                           | Peroxisome proliferator-activated receptor alpha (NR1C1) | Hs00947536_m1   |
|                                                | PPAR $\gamma$                           | Peroxisome proliferator-activated receptor gamma (NR1C3) | Hs01115513_m1   |
|                                                | HIF1A                                   | Hypoxia-inducible factor 1-alpha                         | Hs00153153_m1   |
|                                                | HNF1a                                   | Hepatic nuclear factor 1 alpha                           | Hs00167041_m1   |
|                                                | HNF1b                                   | Hepatic nuclear factor 1 beta                            | Hs00172123_m1   |
|                                                | HNF3a                                   | Hepatic nuclear factor 3 alpha (FOXA1)                   | Hs04187555_m1   |
|                                                | HNF3b                                   | Hepatic nuclear factor 3 beta (FOXA2)                    | Hs00232764_m1   |
|                                                | HNF4a                                   | Hepatic nuclear factor 4 alpha                           | Hs00230853_m1   |
|                                                | HNF4a-P1 promoter-driven-Adult isoforms | Hepatic nuclear factor 4 alpha                           | Hs00604431_m1   |
|                                                | HNF4a-P2 promoter-driven-Fetal isoforms | Hepatic nuclear factor 4 alpha                           | Hs01025522_m1   |
|                                                | HNF6                                    | Hepatic nuclear factor 6 (ONECUT1)                       | Hs00413554_m1   |
|                                                | AHR                                     | Aryl hydrocarbon receptor                                | Hs00169233_m1   |
|                                                | GR                                      | Glucocorticoid receptor (NR3C1)                          | Hs00353740_m1   |
| Transporters                                   | NTCP                                    | Sodium/bile acid cotransporter 1 (SLC10A1)               | Hs00914889_m1   |
|                                                | P-GP                                    | ATP-binding cassette, B1 (ABCB1 - MDR1)                  | Hs00184500_m1   |
|                                                | MDR3                                    | ATP-binding cassette, B4 (ABCB4)                         | Hs00240956_m1   |
|                                                | MRP2                                    | ATP-binding cassette, C2 (ABCC2)                         | Hs00166123_m1   |
|                                                | MRP3                                    | ATP-binding cassette, C3 (ABCC3)                         | Hs00978473_m1   |
|                                                | MRP4                                    | ATP-binding cassette, C4 (ABCC4)                         | Hs00988717_m1   |
|                                                | BSEP                                    | ATP-binding cassette, B11 (ABCB11)                       | Hs00184824_m1   |
|                                                | BCRP                                    | ATP-binding cassette, G2 (ABCG2)                         | Hs00184979_m1   |
| Pluripotency genes                             | DLK1                                    | Delta-like 1 homolog                                     | Hs00171584_m1   |
|                                                | NANOG                                   | Nanog homeobox                                           | Hs04260366_g1   |
|                                                | SOX2                                    | SRY (sex determining region Y)-box 2                     | Hs01053049_s1   |
|                                                | SOX9                                    | SRY (sex determining region Y)-box 9                     | Hs01001343_g1   |
|                                                | SOX17                                   | SRY (sex determining region Y)-box 17                    | Hs00751752_s1   |
| OCT4                                           | Octamer-binding transcription factor    | Hs00742896_s1                                            |                 |

(continued)

SUPPLEMENTARY TABLE S2. (CONTINUED)

|             | <i>Gene symbol</i> | <i>Gene name</i>                    | <i>Assay ID</i> |
|-------------|--------------------|-------------------------------------|-----------------|
| Other genes | KRT7               | Keratin 7 (KRT7)                    | Hs01115174_mH   |
|             | KRT8               | Keratin 8 (KRT8)                    | Hs02339474_g1   |
|             | KRT18              | Keratin 18 (KRT18)                  | Hs01653110_s1   |
|             | KRT19              | Keratin 19 (KRT19)                  | Hs00761767_s1   |
|             | CTNNB1             | CTNNB1, cadherin-associated protein | Hs00355049_m1   |
|             | MET                | Met proto-oncogene (HGF receptor)   | Hs01565582_g1   |
|             | ASGR1              | Asialoglycoprotein receptor 1       | Hs00155881_m1   |
